# Supplementary material for: Mapping Complex Cropping Patterns in China (2018–2021) at 10 m Resolution: A Data-Driven Framework based on Multi-Product Integration and Google Satellite Embedding
Source: Copernicus journal article supplement (doi:10.5194/essd-2025-679), 2025-12-04
Supplement: Supplementary file 1 [file essd-2025-679-supplement.pdf]

# Supplement Information

## **Mapping Complex Cropping Patterns in China (2018–2021) at 10 m Resolution: A Data-Driven Framework based on Multi-Product Integration and Google Satellite Embedding**

Xiyu Li<sup>1</sup>, Le Yu<sup>1,2,3\*</sup>

<sup>1</sup> Ministry of Education Key Laboratory for Earth System Modeling, Department of Earth System Science, Tsinghua University, Beijing, 100084, China

<sup>2</sup> Ministry of Education Ecological Field Station for East Asian Migratory Birds, Beijing 100084, China

<sup>3</sup> Institute of Carbon Neutrality, Tsinghua University, Beijing, 100084, China

*Correspondence to:* Le Yu ([leyu@tsinghua.edu.cn](mailto:leyu@tsinghua.edu.cn))

### **Contents**

S1. Data and method

S2. Results validation and comparison

## **S1. Data and method**

### **S1.1 Agro-Natural Regionalization**

The Agro-Natural Regionalization of China was proposed by Mr. Qiu Baojian and Mr. Huang Bingwei, who divided China into 38 agricultural natural regions based on temperature zones and moisture conditions (Fig S1, Table S1).

Based on thermal conditions, China is divided into 14 temperature zones defined by multiple indices, including accumulated temperature, mean temperature of the coldest month, and mean temperature of the warmest month (Table S2). These zones reflect the country's thermal resources and growing season length, and they differ significantly in cropping systems and dominant agricultural products. In addition, according to moisture conditions, the whole country is further divided into four regions of different humidity regimes: humid, semi-humid, semi-arid, and arid zones (Table S3). These reflect the balance between precipitation and evapotranspiration, which directly affects vegetation patterns, land use, and agricultural practices. By overlaying the classification of temperature zones with that of moisture conditions, the framework of agricultural natural regionalization was established. This systematic division highlights how both heat (temperature) and water (moisture) jointly determine the spatial differentiation of China's agriculture, leading to distinct regional cropping systems, land-use patterns, and dominant agricultural products.

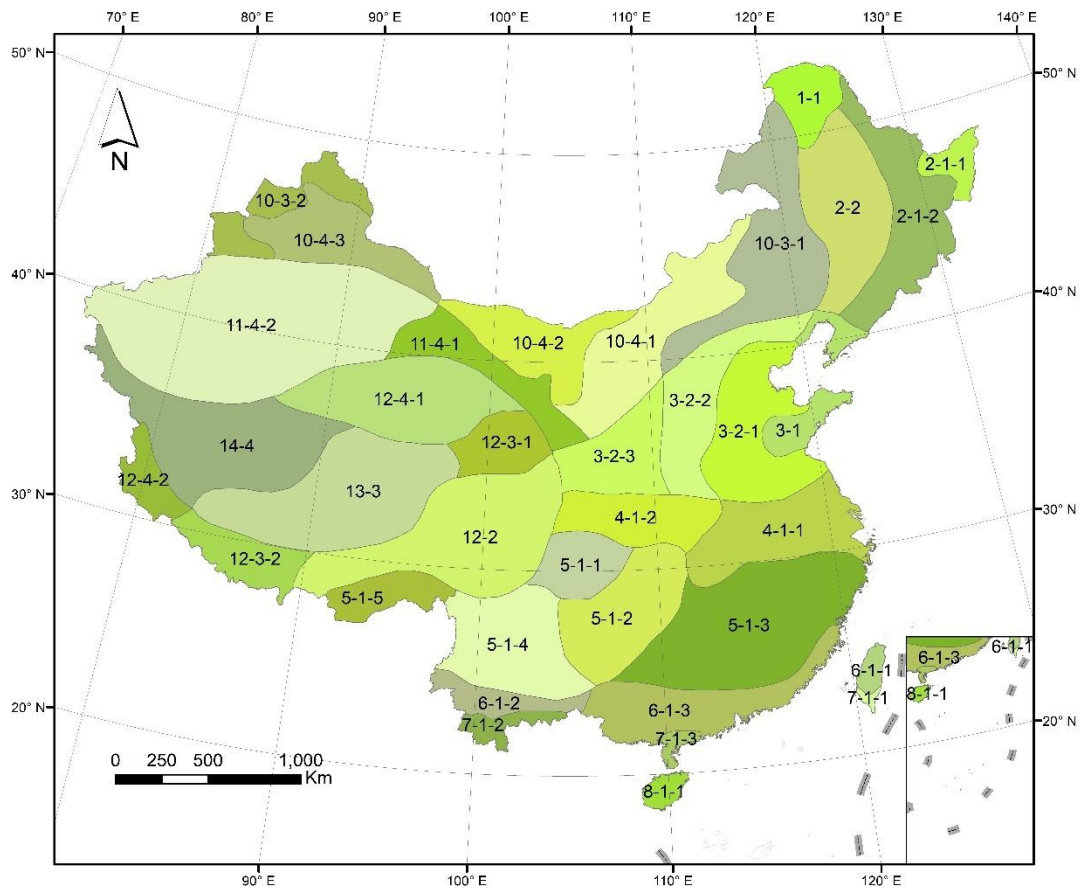

Fig S1 Agro-Natural Regionalization of China.

## S1.2 Multi-Product coverage

We synthesize multiple publicly available crop mapping products in China (Table 1). These products include seven major crop types: maize, rice, wheat, soybean, rapeseed, sugarcane, and cotton. These products differ in spatial coverage (Table S4). Some focus on key production regions, for example, winter wheat mapping in the Huang–Huai–Hai Plain, which accounts for about 90% of China’s total output, and cotton mapping in Xinjiang, which contributes more than 80% of national production. Others, such as maize and rapeseed, extend to almost all provinces nationwide. Importantly, the spatial extent of existing crop distribution products is not temporally continuous or consistent but varies across years. To address this limitation, we generate crop distribution products with continuous temporal coverage and consistent spatial extent by applying spatiotemporal transfer of classifiers to fill gaps in specific years

and regions.

Some special treatments were applied to specific crops. For rice, outside the three northeastern provinces there is essentially only one dataset available, namely the double- and single-cropping rice maps developed by Yuan's research lab (Pan et al., 2021; Shen et al., 2023). In these regions, areas where two maps overlap reflect inconsistencies instead of agreement and were therefore treated separately. In addition, the soybean area in eastern Inner Mongolia, adjacent to the three northeastern provinces, was excluded from the provincial coverage since it did not represent the whole province and was treated separately as a special case.

.

Table S1. Agro-Natural Regionalization of China

| ID    | Name                                      | Temperature Zone     | Moisture Zone   |
|-------|-------------------------------------------|----------------------|-----------------|
| 1-1   | Northern Greater Khingan Range Area       | Cold Temperate       | Humid Zone      |
| 2-1-1 | Sanjiang Plain                            | Middle Temperate     | Humid Zone      |
| 2-1-2 | Lesser Khingan–Changbai Mountain Area     | Middle Temperate     | Humid Zone      |
| 2-2   | Songliao Plain                            | Middle Temperate     | Semi-Humid Zone |
| 3-1   | Liaodong–Shandong Peninsula               | Warm Temperate       | Humid Zone      |
| 3-2-1 | North China Plain                         | Warm Temperate       | Semi-Humid Zone |
| 3-2-2 | North China Mountain Area                 | Warm Temperate       | Semi-Humid Zone |
| 3-2-3 | Loess Plateau                             | Warm Temperate       | Semi-Humid Zone |
| 4-1-1 | Middle–Lower Yangtze River Area           | Northern Subtropical | Humid Zone      |
| 4-1-2 | Upper–Middle Han River Area               | Northern Subtropical | Humid Zone      |
| 5-1-1 | Sichuan Basin                             | Central Subtropical  | Humid Zone      |
| 5-1-2 | Guizhou Plateau                           | Central Subtropical  | Humid Zone      |
| 5-1-3 | Jiangnan Hilly Area                       | Central Subtropical  | Humid Zone      |
| 5-1-4 | Yunnan Plateau                            | Central Subtropical  | Humid Zone      |
| 5-1-5 | Southern Slope of the Himalayas Area      | Central Subtropical  | Humid Zone      |
| 6-1-1 | Taipei Area                               | Southern Subtropical | Humid Zone      |
| 6-1-2 | Southern Yunnan Mountain Area             | Southern Subtropical | Humid Zone      |
| 6-1-3 | Fujian–Guangdong Hilly Area               | Southern Subtropical | Humid Zone      |
| 7-1-1 | Tainan Area                               | Marginal Tropical    | Humid Zone      |
| 7-1-2 | Valleys and Basins of Southern Yunnan     | Marginal Tropical    | Humid Zone      |
| 7-1-3 | Qiong–Le Area (Hainan & Leizhou)          | Marginal Tropical    | Humid Zone      |
| 8-1-1 | Southern Hainan Island Area               | Mid-Tropical         | Humid Zone      |
| 8-1-2 | Dongsha, Zhongsha, and Xisha Islands Area | Mid-Tropical         | Humid Zone      |

| ID     | Name                                            | Temperature Zone        | Moisture Zone   |
|--------|-------------------------------------------------|-------------------------|-----------------|
| 9-1    | Nansha Islands Area                             | Equatorial Tropical     | Humid Zone      |
| 10-3-1 | Eastern Inner Mongolia Area                     | Arid Middle Temperate   | Semi-Arid Zone  |
| 10-3-2 | Northwestern Mountain Area of Northern Xinjiang | Arid Middle Temperate   | Semi-Arid Zone  |
| 10-4-1 | Central Inner Mongolia Area                     | Arid Middle Temperate   | Arid Zone       |
| 10-4-2 | Western Inner Mongolia Area                     | Arid Middle Temperate   | Arid Zone       |
| 10-4-3 | Northern Xinjiang Area                          | Arid Middle Temperate   | Arid Zone       |
| 11-4-1 | Hexi Corridor Area                              | Arid Warm Temperate     | Arid Zone       |
| 11-4-2 | Southern Xinjiang Area                          | Arid Warm Temperate     | Arid Zone       |
| 12-2   | Western Sichuan–Eastern Tibet Area              | Plateau Temperate       | Semi-Humid Zone |
| 12-3-1 | Qinghai Area                                    | Plateau Temperate       | Semi-Arid Zone  |
| 12-3-2 | Southern Tibet Area                             | Plateau Temperate       | Semi-Arid Zone  |
| 12-4-1 | Qaidam Basin                                    | Plateau Temperate       | Arid Zone       |
| 12-4-2 | Western Tibet Area                              | Plateau Temperate       | Arid Zone       |
| 13-3   | Southern Qiangtang Area                         | Plateau Sub-Frigid Zone | Semi-Arid Zone  |
| 14-4   | Northern Qiangtang Area                         | Plateau Frigid Zone     | Arid Zone       |

Table S2 Regional Division of Temperature Zones and Associated Cropping Systems in China

| Zone Type | Zone                          | Accum. Temp. $\geq 10^{\circ}\text{C}$ ( $^{\circ}\text{C}$ ) | Coldest Month Temp. ( $^{\circ}\text{C}$ ) | Annual Extreme Low Mean ( $^{\circ}\text{C}$ ) |
|-----------|-------------------------------|---------------------------------------------------------------|--------------------------------------------|------------------------------------------------|
| Monsoon   | 1 Cold Temperate Zone         | <1700                                                         | <-30                                       | <-45                                           |
|           | 2 Middle Temperate Zone       | 1700–3500                                                     | -30 ~ -10                                  | -45 – -25                                      |
|           | 3 Warm Temperate Zone         | 3500–4500                                                     | -10 – 0                                    | -25 – -10                                      |
|           | 4 Northern Subtropical Zone   | 4500–5300                                                     | 0 – 5                                      | -10 – -5                                       |
|           | 5 Central Subtropical Zone    | 5300–6500                                                     | 5 – 10                                     | -5 – 0                                         |
|           | 6 Southern Subtropical Zone   | 6500–8000                                                     | 10 – 15                                    | 0 – 5                                          |
|           | 7 Marginal Tropical Zone      | 8000–8500                                                     | 15 – 18                                    | 5 – 8                                          |
|           | 8 Central Tropical Zone       | >8500                                                         | >18                                        | >8                                             |
|           | 9 Equatorial Tropical Zone    | >9000                                                         | >25                                        | >20                                            |
| Arid      | 10 Arid Middle Temperate Zone | <4000                                                         | <-10                                       | <-20                                           |
|           | 11 Arid Warm Temperate Zone   | >4000                                                         | >-10                                       | >-20                                           |
|           |                               | Accum. Temp. $\geq 0^{\circ}\text{C}$ ( $^{\circ}\text{C}$ )  | Warmest Month Temp. ( $^{\circ}\text{C}$ ) |                                                |
| High-cold | 12 Plateau Frigid Zone        | $\leq 500$                                                    | <6                                         |                                                |
|           | 13 Plateau Sub-Frigid Zone    | 500–1500                                                      | 6 – 10                                     |                                                |
|           | 14 Plateau Temperate Zone     | 1500–3500                                                     | 10 – 18                                    |                                                |

Table S3 Regional Division of Humid and Arid Zones in China

| Region             | Annual<br>Precipitation<br>(mm) | Humidity Condition          | Distribution Area                                                                                                                                   | Vegetation       | Land Use                                                 |
|--------------------|---------------------------------|-----------------------------|-----------------------------------------------------------------------------------------------------------------------------------------------------|------------------|----------------------------------------------------------|
| Humid Zone         | >800                            | Precipitation > Evaporation | South of the Qinling Mountains–<br>Huaihe River line, southern<br>Qinghai–Tibet Plateau, northeastern<br>Inner Mongolia, eastern Northeast<br>China | Forest           | Agriculture dominated<br>by paddy fields                 |
| Semi-Humid<br>Zone | >400                            | Precipitation > Evaporation | Northeast Plain, North China Plain,<br>most of the Loess Plateau,<br>southeastern Qinghai–Tibet Plateau                                             | Forest–Grassland | Agriculture dominated<br>by dry farming                  |
| Semi-Arid Zone     | <400                            | Precipitation < Evaporation | Inner Mongolia Plateau, part of the<br>Loess Plateau, most of the Qinghai–<br>Tibet Plateau                                                         | Grassland        | Grassland livestock<br>grazing, irrigated<br>farming     |
| Arid Zone          | <200                            | Precipitation < Evaporation | Xinjiang, western Inner Mongolia<br>Plateau, northwestern Qinghai–Tibet<br>Plateau                                                                  | Desert           | Alpine livestock<br>grazing, oasis irrigation<br>farming |

Table S4 Province coverage of crop type maps collected by this study

|                | c1 | m1 | m2 | m3 | m4 | m5 | m6 | m7 | ra1 | ra2 | ra3 | ri1 | ri2 | ri3 | ri4 | so1 | so2 | so3 | so4 | so5 | su1 | su2 | w1 | w2 | w3 | w4 |
|----------------|----|----|----|----|----|----|----|----|-----|-----|-----|-----|-----|-----|-----|-----|-----|-----|-----|-----|-----|-----|----|----|----|----|
| Anhui          | 0  | 0  | 0  | 1  | 0  | 1  | 1  | 1  | 1   | 1   | 1   | 0   | 0   | 1   | 1   | 0   | 0   | 1   | 1   | 1   | 0   | 1   | 1  | 1  | 1  | 1  |
| Macau          | 0  | 0  | 0  | 0  | 0  | 0  | 0  | 1  | 1   | 0   | 1   | 0   | 0   | 0   | 0   | 0   | 0   | 1   | 0   | 0   | 0   | 0   | 0  | 0  | 0  | 0  |
| Beijing        | 0  | 0  | 0  | 0  | 0  | 1  | 0  | 1  | 1   | 0   | 1   | 0   | 0   | 0   | 0   | 0   | 0   | 1   | 0   | 0   | 0   | 0   | 0  | 1  | 1  | 0  |
| Fujian         | 0  | 0  | 0  | 0  | 0  | 1  | 0  | 1  | 1   | 0   | 1   | 0   | 0   | 1   | 1   | 0   | 0   | 1   | 0   | 0   | 0   | 1   | 0  | 0  | 0  | 0  |
| Gansu          | 0  | 0  | 0  | 1  | 1  | 1  | 1  | 1  | 1   | 0   | 1   | 0   | 0   | 0   | 0   | 0   | 0   | 1   | 0   | 0   | 0   | 0   | 1  | 0  | 0  | 0  |
| Guangdong      | 0  | 0  | 0  | 0  | 0  | 1  | 0  | 1  | 1   | 0   | 1   | 0   | 0   | 1   | 0   | 0   | 0   | 1   | 0   | 0   | 1   | 1   | 0  | 0  | 0  | 0  |
| Guangxi        | 0  | 0  | 0  | 1  | 0  | 1  | 1  | 1  | 1   | 0   | 1   | 0   | 0   | 1   | 1   | 0   | 0   | 1   | 0   | 0   | 1   | 1   | 0  | 0  | 0  | 0  |
| Guizhou        | 0  | 0  | 0  | 1  | 0  | 1  | 1  | 1  | 1   | 1   | 1   | 0   | 0   | 0   | 1   | 0   | 0   | 1   | 1   | 0   | 0   | 1   | 0  | 0  | 0  | 0  |
| Hainan         | 0  | 0  | 0  | 0  | 0  | 0  | 0  | 1  | 1   | 0   | 1   | 0   | 0   | 1   | 0   | 0   | 0   | 1   | 0   | 0   | 1   | 1   | 0  | 0  | 0  | 0  |
| Hebei          | 0  | 0  | 0  | 1  | 1  | 1  | 1  | 1  | 1   | 0   | 1   | 0   | 0   | 0   | 0   | 0   | 0   | 1   | 0   | 0   | 0   | 0   | 1  | 1  | 1  | 1  |
| Henan          | 0  | 0  | 0  | 1  | 0  | 1  | 1  | 1  | 1   | 0   | 1   | 0   | 0   | 0   | 1   | 0   | 0   | 1   | 1   | 1   | 0   | 1   | 1  | 1  | 1  | 1  |
| Heilongjiang   | 0  | 1  | 1  | 1  | 1  | 1  | 1  | 1  | 1   | 0   | 1   | 1   | 1   | 0   | 1   | 1   | 1   | 1   | 1   | 1   | 0   | 0   | 0  | 0  | 0  | 0  |
| Hubei          | 0  | 0  | 0  | 1  | 0  | 1  | 1  | 1  | 1   | 1   | 1   | 0   | 0   | 1   | 1   | 0   | 0   | 1   | 1   | 1   | 0   | 1   | 1  | 1  | 1  | 1  |
| Hunan          | 0  | 0  | 0  | 1  | 0  | 1  | 1  | 1  | 1   | 1   | 1   | 0   | 0   | 1   | 1   | 0   | 0   | 1   | 0   | 0   | 0   | 1   | 0  | 0  | 0  | 0  |
| Jilin          | 0  | 1  | 1  | 1  | 1  | 1  | 1  | 1  | 1   | 0   | 1   | 1   | 1   | 0   | 1   | 1   | 1   | 1   | 1   | 1   | 0   | 0   | 0  | 0  | 0  | 0  |
| Jiangsu        | 0  | 0  | 0  | 1  | 0  | 1  | 1  | 1  | 1   | 1   | 1   | 0   | 0   | 0   | 1   | 0   | 0   | 1   | 1   | 1   | 0   | 1   | 1  | 1  | 1  | 1  |
| Jiangxi        | 0  | 0  | 0  | 0  | 0  | 1  | 0  | 1  | 1   | 1   | 1   | 0   | 0   | 1   | 1   | 0   | 0   | 1   | 0   | 0   | 0   | 1   | 0  | 0  | 0  | 0  |
| Liaoning       | 0  | 1  | 1  | 1  | 1  | 1  | 1  | 1  | 1   | 0   | 1   | 1   | 1   | 0   | 1   | 1   | 1   | 1   | 0   | 1   | 0   | 0   | 0  | 0  | 0  | 0  |
| Inner Mongolia | 0  | 0  | 0  | 1  | 1  | 1  | 1  | 1  | 1   | 0   | 1   | 0   | 0   | 0   | 1   | 0   | 0   | 1   | 0   | 0   | 0   | 0   | 0  | 0  | 0  | 0  |
| Ningxia        | 0  | 0  | 0  | 1  | 1  | 1  | 1  | 1  | 1   | 0   | 1   | 0   | 0   | 0   | 1   | 0   | 0   | 1   | 0   | 0   | 0   | 0   | 0  | 0  | 0  | 0  |
| Qinghai        | 0  | 0  | 0  | 0  | 0  | 1  | 0  | 1  | 1   | 0   | 1   | 0   | 0   | 0   | 0   | 0   | 0   | 1   | 0   | 0   | 0   | 0   | 0  | 0  | 0  | 0  |
| Shandong       | 0  | 0  | 0  | 1  | 0  | 1  | 1  | 1  | 1   | 0   | 1   | 0   | 0   | 0   | 1   | 0   | 0   | 1   | 1   | 1   | 0   | 1   | 1  | 1  | 1  | 1  |

|           | c1 | m1 | m2 | m3 | m4 | m5 | m6 | m7 | ra1 | ra2 | ra3 | ri1 | ri2 | ri3 | ri4 | so1 | so2 | so3 | so4 | so5 | su1 | su2 | w1 | w2 | w3 | w4 |
|-----------|----|----|----|----|----|----|----|----|-----|-----|-----|-----|-----|-----|-----|-----|-----|-----|-----|-----|-----|-----|----|----|----|----|
| Shanxi    | 0  | 0  | 0  | 1  | 1  | 1  | 1  | 1  | 1   | 0   | 1   | 0   | 0   | 0   | 0   | 0   | 0   | 1   | 1   | 0   | 0   | 1   | 1  | 1  | 1  | 1  |
| Shaanxi   | 0  | 0  | 0  | 1  | 1  | 1  | 1  | 1  | 1   | 0   | 1   | 0   | 0   | 0   | 1   | 0   | 0   | 1   | 1   | 0   | 0   | 1   | 1  | 1  | 1  | 1  |
| Shanghai  | 0  | 0  | 0  | 0  | 0  | 1  | 0  | 1  | 1   | 1   | 1   | 0   | 0   | 0   | 1   | 0   | 0   | 1   | 0   | 0   | 0   | 0   | 0  | 0  | 0  | 0  |
| Sichuan   | 0  | 0  | 0  | 1  | 0  | 1  | 1  | 1  | 1   | 1   | 1   | 0   | 0   | 0   | 1   | 0   | 0   | 1   | 0   | 1   | 0   | 1   | 1  | 0  | 0  | 0  |
| Taiwan    | 0  | 0  | 0  | 0  | 0  | 0  | 0  | 1  | 1   | 0   | 1   | 0   | 0   | 0   | 0   | 0   | 0   | 1   | 0   | 0   | 0   | 0   | 0  | 0  | 0  | 0  |
| Tianjin   | 0  | 0  | 0  | 1  | 0  | 1  | 1  | 1  | 1   | 0   | 1   | 0   | 0   | 0   | 0   | 0   | 0   | 1   | 0   | 0   | 0   | 0   | 0  | 1  | 1  | 0  |
| Tibet     | 0  | 0  | 0  | 0  | 0  | 0  | 0  | 1  | 1   | 0   | 1   | 0   | 0   | 0   | 0   | 0   | 0   | 1   | 0   | 0   | 0   | 0   | 0  | 0  | 0  | 0  |
| Hong Kong | 0  | 0  | 0  | 0  | 0  | 0  | 0  | 1  | 1   | 0   | 1   | 0   | 0   | 0   | 0   | 0   | 0   | 1   | 0   | 0   | 0   | 0   | 0  | 0  | 0  | 0  |
| Xinjiang  | 1  | 0  | 0  | 1  | 1  | 1  | 1  | 1  | 1   | 0   | 1   | 0   | 0   | 0   | 0   | 0   | 0   | 1   | 0   | 0   | 0   | 0   | 1  | 0  | 0  | 0  |
| Yunnan    | 0  | 0  | 0  | 1  | 0  | 1  | 1  | 1  | 1   | 1   | 1   | 0   | 0   | 0   | 1   | 0   | 0   | 1   | 1   | 0   | 1   | 1   | 0  | 0  | 0  | 0  |
| Zhejiang  | 0  | 0  | 0  | 0  | 0  | 1  | 0  | 1  | 1   | 1   | 1   | 0   | 0   | 1   | 1   | 0   | 0   | 1   | 0   | 0   | 0   | 1   | 0  | 0  | 0  | 0  |
| Chongqing | 0  | 0  | 0  | 1  | 0  | 1  | 1  | 1  | 1   | 1   | 1   | 0   | 0   | 0   | 1   | 0   | 0   | 1   | 1   | 0   | 0   | 1   | 0  | 0  | 0  | 0  |

c:cotton; m:maize; ra:rapeseed; ri:rice; so:soybean; su:sugarcane; w:wheat.

Products with partial rather than full provincial coverage were excluded from this table, but were given special treatment during mapping process (as described above).

## S2. Results validation and comparison

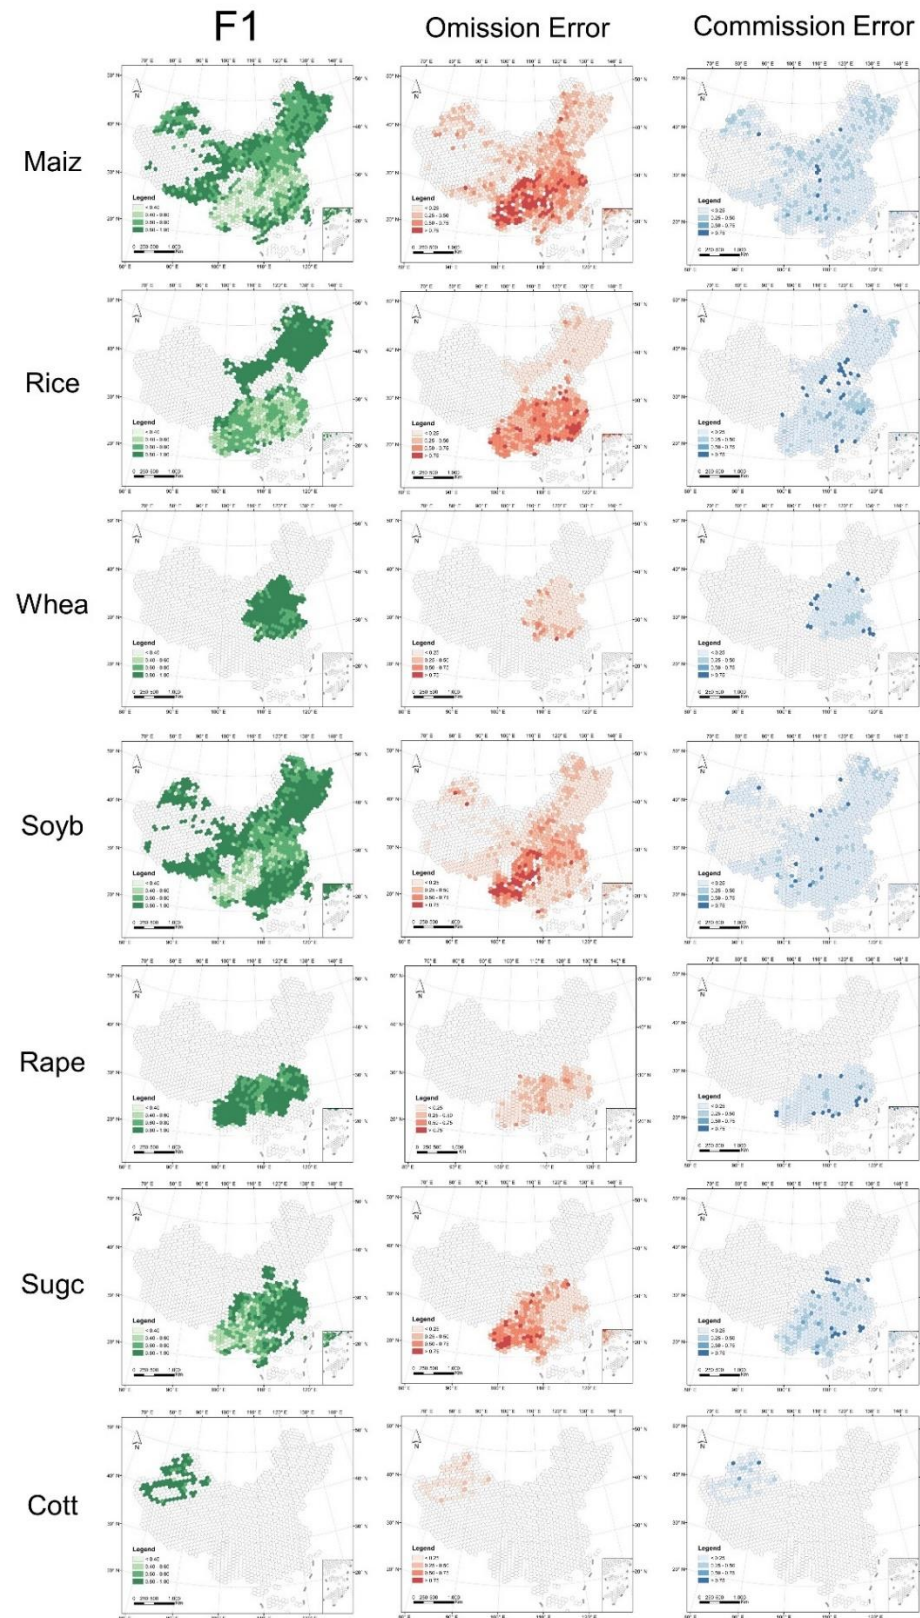

Figure S2 Spatial variation of mean accuracy of classifiers for year periods from 2018 to 2021 per crop type.

## Reference:

- Pan, B., Zheng, Y., Shen, R., Ye, T., Zhao, W., Dong, J., . . . Yuan, W. (2021). High Resolution Distribution Dataset of Double-Season Paddy Rice in China. *Remote Sensing*, 13(22). doi:10.3390/rs13224609
- Shen, R., Pan, B., Peng, Q., Dong, J., Chen, X., Zhang, X., . . . Yuan, W. (2023). High-resolution distribution maps of single-season rice in China from 2017 to 2022. *Earth Syst. Sci. Data*, 15(7), 3203-3222. doi:10.5194/essd-15-3203-2023
- Wang, S., Azzari, G., & Lobell, D. B. (2019). Crop type mapping without field-level labels: Random forest transfer and unsupervised clustering techniques. *Remote Sensing of Environment*, 222, 303-317. doi:<https://doi.org/10.1016/j.rse.2018.12.026>
- Huang, B.W. (1959). Draft of China's comprehensive physical regionalization. *Science Bulletin*, 18, 594–602. [in Chinese]
- Qiu, B.J. (1989). Agricultural natural regionalization. In *National Agricultural Atlas* (pp. 20–21). China Cartographic Publishing House. [in Chinese]
